# Supplementary material
Source: PubMed Central journal article supplement (PMC5013791)
Supplement: rspb20160957supp1.pdf [file rspb20160957supp1.pdf]

1 **Interactions between demography, genetics, and landscape connectivity increase extinction**  
2 **probability in a small population of large carnivores in a major metropolitan area**

3 John F. Benson<sup>\*</sup>, Peter J. Mahoney, Jeff A. Sikich, Laurel E.K. Serieys, John P. Pollinger, Holly  
4 B. Ernest, and Seth P.D. Riley

5 <sup>\*</sup>benson.johnf@gmail.com

6 Supplementary Materials: Appendix A, Tables S1-S6.

7 **Appendix A.**

8 **Model structure details**

9 We developed the model in R using multiple packages and self-authored code to implement the  
10 functions and processes executed within the model. The full R code for our model is available at  
11 [https://github.com/PMahoney29/Puma\\_IBM](https://github.com/PMahoney29/Puma_IBM). We used the R6 reference class system (package  
12 ‘R6’), a light-weight object-oriented programming structure that operates within R and allows  
13 classes to be easily inherited across different R packages. The model was built with a nested  
14 class structure where an ‘individual’ class (mountain lions within the model) was nested within a  
15 ‘population’ class (all individuals within a single projection of the model) which was nested  
16 within a ‘simulation’ class (all populations projected during a given model run). The population  
17 and simulation classes were primarily containers for individuals and populations, respectively,  
18 and aided in data aggregation and model interpretation. Each class level contained class-specific  
19 methods for simulating demographic processes and for data aggregation.

20 **(i) Individual class**

21 Every individual was characterized by 13 state variables within an individual class object: animal  
22 ID, sex, age (in months), mother’s ID, father’s ID, age class, age at transition to adult (sex-  
23 specific), reproductive status, survival status, birth month, mortality month, immigrant status,  
24 and genotype (54 loci). An individual’s immigrant status indicated whether it was born in the

25 SMMs or immigrated from an external population (see below). All individuals in the starting  
26 and immigrant populations were assigned empirical genotypes, whereas genotypes for offspring  
27 produced within the model were derived through simple Mendelian genetics (i.e. 1 allele  
28 randomly inherited from each parent at each loci). We limited reproduction to adult males and to  
29 adult females without dependent offspring.

### 30 **(ii) Population class**

31 During each monthly time step, the following procedures took place for all living individuals  
32 within the population: mortality assessment, increase of time/age increment, age class  
33 assessment, breeding status assessment, and reproduction assessment. All individuals (alive or  
34 dead) within a given population were retained as a complete list of individual class objects.  
35 Living individuals on this list were retained for future time steps. The model stored active litters  
36 as a list within the population class object that contained the ID of the mother and all dependent  
37 offspring. This active litter variable was used to classify reproductive status and breeding  
38 eligibility for adult females. Population size was stored as a list containing counts on a monthly  
39 basis by sex and age class combinations, and all ages and sexes combined. A final procedure  
40 during each time step updated all population-level statistics, including identifying population size  
41 and extinction status. The population was considered to be extinct only when no females  
42 remained in the population. The population persisted in the absence of males because it could be  
43 rescued by immigration of males. Genetic composition at the population level was aggregated  
44 on an annual basis to allow us to monitor trends in genetic diversity.

### 45 **(iii) Simulation Class**

46 At the end of a simulation, the complete list of individuals was converted into a data frame and  
47 stored within the simulation object. We queried these simulation objects to extract demographic  
48 and genetic results which were averaged across each population projection of a given simulation.

49  
50  
51  
52  
53  
54  
55  
56  
57  
58  
59  
60  
61  
62  
63  
64  
65  
66  
67  
68  
69  
70  
71  
72  
73  
74  
75  
76  
77  
78  
79  
80  
81  
82  
83  
84  
85  
86

87 Table S1. Demographic parameters estimated from radiotelemetry data and field investigations  
 88 of mortality and natal den sites for 33 mountain lions in the Santa Monica Mountains, southern  
 89 California, 2002-2015.

|                                | Females           |          | Males             |          |
|--------------------------------|-------------------|----------|-------------------|----------|
|                                | estimate $\pm$ SE | <i>n</i> | estimate $\pm$ SE | <i>n</i> |
| Adult survival <sup>a</sup>    | 0.900 $\pm$ 0.09  | 5        | 0.833 $\pm$ 0.11  | 5        |
| Subadult survival <sup>a</sup> | 0.625 $\pm$ 0.17  | 10       | 0.444 $\pm$ 0.15  | 12       |
| Kitten survival <sup>a,b</sup> | 0.724 $\pm$ 0.12  | 9        | 0.724 $\pm$ 0.12  | 7        |
| Litter size                    | 2.88 $\pm$ 0.34   | 7        | NA                |          |
| Age of first reproduction      | 25-33 months      | 3        | 42 months         | 1        |

90

91 <sup>a</sup> Annual estimate, <sup>b</sup> Males and females pooled due to small sample sizes

92

93

94

95

96

97

98

99

100

101

102

103

104

105

106

107

108 Table S2. Sensitivity and proportional sensitivity (elasticity) of density independent stochastic  
109 population growth ( $\lambda_s$ ) to 5% increases in age class and sex specific survival and litter size in  
110 individual-based population model for Santa Monica Mountain mountain lion population.  
111 Results based on 5000 projections of 25 years.

---

| Parameter                | Sensitivity | Elasticity |
|--------------------------|-------------|------------|
| Adult female survival    | 0.90        | 0.25       |
| Subadult female survival | 0.48        | 0.09       |
| Kitten female survival   | 0.34        | 0.08       |
| Adult male survival      | 0.06        | 0.02       |
| Subadult male survival   | 0.09        | 0.01       |
| Kitten male survival     | 0.03        | 0.01       |
| Litter size              | 0.09        | 0.08       |

---

112

113

114

115

116

117

118

119

120

121

122

123

124

125

126

127

128

129

130 Table S3. Demographic results predicted by individual-based population model for Santa Monica Mountain lions in  
 131 Southern California with immigration of both sexes. Immigrants had an equal probability of being male or female. Values are mean  
 132 (unless otherwise noted) estimates at year 50 based on 5000 population projections.

|                         | No immigration |                | 1 immigrant/13 years |                | 1 immigrant/4 years |                | 1 immigrant/2 years |                |
|-------------------------|----------------|----------------|----------------------|----------------|---------------------|----------------|---------------------|----------------|
|                         | Estimate       | 95% HPD*       | Estimate             | 95% HPD*       | Estimate            | 95% HPD*       | Estimate            | 95% HPD*       |
| <u>2 males breeding</u> |                |                |                      |                |                     |                |                     |                |
| $\lambda^\dagger$       | 1.01           | (0.91, 1.02)   | 1.01                 | (0.93, 1.02)   | 1.01                | (0.96, 1.02)   | 1.01                | (0.98, 1.02)   |
| Extinction prob.        | 0.220          | (0.208, 0.231) | 0.176                | (0.165, 0.186) | 0.102               | (0.092, 0.108) | 0.037               | (0.032, 0.043) |
| Extinction time         | 30.79          | (12.08, 47.33) | 32.27                | (14.00, 49.67) | 32.11               | (12.58, 49.58) | 32.08               | (13.33, 49.58) |
| Adults ( <i>n</i> )     | 5.16           | (0, 8)         | 5.49                 | (0, 8)         | 6.06                | (0, 8)         | 6.63                | (3, 8)         |
| $N_E$                   | 3.95           | (0, 6)         | 4.07                 | (0, 6)         | 4.10                | (0, 6)         | 4.30                | (0, 6)         |

133

134 \* 95% highest posterior density credible intervals

135 † Median stochastic population growth rate

136

137

138

139

140

141

142

143

144 Table S4. Genetic results predicted by individual-based population model for Santa Monica Mountain lions, Southern  
 145 California with immigration by both sexes. Immigrants had equal probability of being male or female. Values are mean estimates at  
 146 year 50 based on 5000 population projections.

|                         | Starting population |       | No immigration |       | 1 migrant/13 years |       | 1 migrant/4 years |       | 1 migrant/2 years |       |
|-------------------------|---------------------|-------|----------------|-------|--------------------|-------|-------------------|-------|-------------------|-------|
|                         | Estimate            | SE    | Estimate       | SE    | Estimate           | SE    | Estimate          | SE    | Estimate          | SE    |
| <u>2 males breeding</u> |                     |       |                |       |                    |       |                   |       |                   |       |
| $H_e$                   | 0.352               | 0.032 | 0.156          | 0.027 | 0.199              | 0.028 | 0.276             | 0.028 | 0.328             | 0.032 |
| $H_o$                   | 0.388               | 0.040 | 0.178          | 0.032 | 0.224              | 0.033 | 0.311             | 0.033 | 0.366             | 0.040 |
| $N_A$                   | 2.220               | 0.123 | 1.468          | 0.077 | 1.662              | 0.085 | 1.960             | 0.097 | 2.190             | 0.105 |
| Fis                     | 0.127               | 0.022 | 0.186          | 0.018 | 0.186              | 0.020 | 0.168             | 0.022 | 0.159             | 0.022 |
| Polymorphic (%)         | 0.778               | ---   | 0.429          | ---   | 0.550              | ---   | 0.715             | ---   | 0.814             | ---   |

147  
 148  
 149  
 150  
 151  
 152  
 153  
 154  
 155  
 156  
 157

158 Table S5. Annual demographic parameters used to simulate inbreeding depression in Santa  
 159 Monica Mountain mountain lions. Values were obtained by reducing age class and sex-specific  
 160 survival rates proportional to reductions documented in Florida panthers experiencing inbreeding  
 161 depression relative to outbred panthers following genetic restoration (13, 19, 22).

---

|                   | Females  |                        | Males    |                        |
|-------------------|----------|------------------------|----------|------------------------|
|                   | estimate | Proportional reduction | estimate | Proportional reduction |
| Adult survival    | 0.825    | 0.92                   | 0.769    | 0.92                   |
| Subadult survival | 0.613    | 0.98                   | 0.380    | 0.86                   |
| Kitten survival   | 0.340    | 0.47                   | 0.340    | 0.47                   |

---

162  
 163  
 164  
 165  
 166  
 167  
 168  
 169  
 170  
 171  
 172  
 173  
 174  
 175  
 176  
 177  
 178  
 179  
 180  
 181



182 Table S6. Demographic results predicted by individual-based population model for Santa Monica  
 183 Mountain mountain lions, Southern California with inbreeding simulated by reducing age and  
 184 sex-specific survival rates proportional to reductions documented in Florida panthers suffering  
 185 inbreeding depression relative to outbred panthers following genetic restoration. Values are  
 186 mean (unless otherwise noted) estimates at year 50 based on 5000 population projections with a  
 187 maximum of 2 males breeding at any given time.

---

|                        | Estimate | 95% CI        |
|------------------------|----------|---------------|
| $\lambda^*$            | 0.88     | (0.76, 0.98)  |
| Extinction probability | 0.997    | (0.998 0.996) |
| Time to extinction*    | 14.50    | (4.25, 30.25) |
| Adults ( <i>n</i> )    | <1       | (0, 0)        |

---

188

189 \* median value

190

191

192

193

194

195

196
